# Supplementary material for: A review of the latest insights into the mechanism of action of strontium in bone
Source: PubMed Central journal article supplement (PMC7210412; doi:10.1016/j.bonr.2020.100273), 2020-04-24
Supplement: mmc1.pdf [file mmc1.pdf]

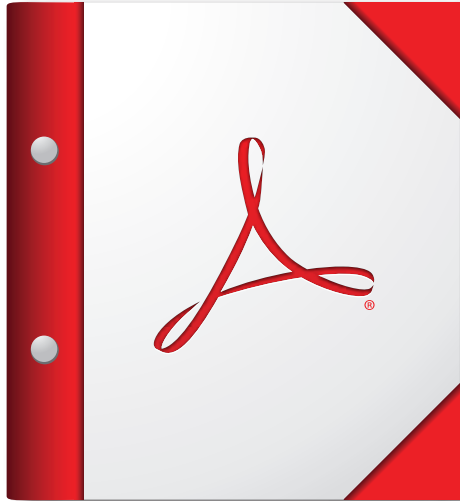

**For the best experience, open this PDF portfolio in  
Acrobat X or Adobe Reader X, or later.**

[Get Adobe Reader Now!](#)
